# Supplementary material for: Force-velocity-power variables derived from isometric and dynamic testing: metrics reliability and the relationship with jump performance
Source: PeerJ. 2024 Nov 8;12:e18371. doi: 10.7717/peerj.18371 (PMC11552493; doi:10.7717/peerj.18371)
Supplement: Supplemental Information 1 [file peerj-12-18371-s001.xlsx]

## Sheet: Planilha1
ID	bodymass	jump height	takeoff momentum	DSI	F_IMTP	F_SJ	V_IMTP	V_SJ	Slope	V0	Pmax
1	74.8561	0.300794	181.562	1.08118	2353.35	1995.36	0	1.04333	-343.125	6.85859	4035.16
2	84.9019	0.310792	209.322	0.964823	2985.02	2242.06	0	1.02	-728.389	4.09811	3058.24
3	78.879	0.201604	156.629	0.84933	3062.34	1950.52	0	0.713333	-1558.63	1.96477	1504.2
4	74.9426	0.272567	173.032	0.992554	2442.37	1859.86	0	0.873333	-667	3.66173	2235.83
5	93.7022	0.272567	216.346	0.80098	3619.18	2362.91	0	1.02667	-1223.64	2.95771	2676.12
6	73.3284	0.19958	144.875	0.664856	3356.49	1882.17	0	0.92	-1602.53	2.0945	1757.55
7	70.6821	0.295038	169.789	0.661115	3501.67	1867.27	0	1.05	-1556.57	2.24961	1969.35
8	67.4067	0.3453	175.171	0.837513	2779.45	1900.93	0	1.2	-732.1	3.79654	2638.07
9	69.35	0.375135	187.846	0.862236	2783.18	1930.78	0	1.20333	-708.366	3.92902	2733.79
10	67.3695	0.301621	163.628	0.829498	2743.12	1842.32	0	1.03	-874.563	3.13656	2151
11	100.664	0.273354	232.755	0.633098	4974.31	2659.97	0	1.19333	-1939.39	2.56488	3189.63
12	79.6153	0.320101	199.206	0.713199	3723.04	2159.91	0	1.16667	-1339.82	2.77876	2586.36
13	72.9713	0.287718	173.1	0.914385	2770.61	2050.35	0	1.14333	-629.965	4.39804	3046.31
14	73.7059	0.216061	151.514	0.938356	2509.18	1888.29	0	0.943333	-658.184	3.81228	2391.42
15	77.5391	0.286104	183.419	0.866162	2826.13	2078.83	0	1.12333	-665.255	4.24819	3001.48
